# Supplementary material for: ENDOU is potentially a robust diagnostic and prognostic biomarker in oral squamous cell carcinoma
Source: Research Square preprint supplement (doi:10.21203/rs.3.rs-6340150/v1), 2025-11-05
Supplement: Supplementary file 2 [file 82166e5b6e301d3868e35355.docx]

|  | **IHC score ENDOU** | | | | **p-value** |
| --- | --- | --- | --- | --- | --- |
|  | 0 | 4 | 6 | 9 |
|  | n (%) | n (%) | n (%) | n (%) |
| **Tissue** |  |  |  |  |  |
| Normal mucosa | 2 (9) | 5 (23) | 3 (14) | 12 (54) | <0.001 |
| Tumor | 65 (93) | 4 (6) | 1 (1) | 0 (0) |
|  |  |  |  |  |  |
| **Age** |  |  |  |  |  |
| < 60 | 38 (68) | 6 (11) | 2 (3) | 10 (18) | 0.34 |
| ≥ 60 | 29 (80) | 3 (8) | 2 (6) | 2 (6) |
|  |  |  |  |  |  |
| **Gender** |  |  |  |  |  |
| Female | 21 (70) | 3 (10) | 1 (3) | 5 (17) | 0.92 |
| Male | 46 (74) | 6 (10) | 3 (5) | 7 (11) |
|  |  |  |  |  |  |
| **Tumor grade** |  |  |  |  |  |
| G1 | 34 (55) | 20 (32) | 8 (13) | 0 (0) | 1.0 |
| G2 | 3 (75) | 1 (25) | 0 (0) | 0 (0) |
| G3 | 1 (100) | 0 (0) | 0 (0) | 0 (0) |
|  |  |  |  |  |  |
| **Stage T** |  |  |  |  |  |
| T1 | 26 (82) | 1 (4) | 1 (4) | 0 (0) | 0.66 |
| T2 | 32 (81) | 3 (9) | 0 (0) | 0 (0) |
| T3 | 5 (100) | 0 (0) | 0 (0) | 0 (0) |
| T4 | 1 (100) | 0 (0) | 0 (0) | 0 (0) |
|  |  |  |  |  |  |
| **Lymph node involvement** |  |  |  |  |  |
| N0 | 58 (92) | 4 (6) | 1 (2) | 0 (0) | 1.0 |
| N1 | 6 (100) | 0 (0) | 0 (0) | 0 (0) |
|  |  |  |  |  |  |
| **Distant metastasis** |  |  |  |  |  |
| M0 | 63 (93) | 4 (6) | 1 (1) | 0 (0) | 1.0 |
| M1 | 1 (100) | 0 (0) | 0 (0) | 0 (0) |
|  |  |  |  |  |  |

*Table 1. Association between ENDOU expression and clinicopathological parameters.*
