# Supplementary material for: ENDOU is potentially a robust diagnostic and prognostic biomarker in oral squamous cell carcinoma
Source: Research Square preprint supplement (doi:10.21203/rs.3.rs-6340150/v1), 2025-11-05
Supplement: Supplementary file 3 [file 8ec2be39cad3e9769cc0af61.docx]

| Study | Reference | Dataset | Normal Mucosa (n) | OSCC (n) |
| --- | --- | --- | --- | --- |
| Verduci, L. *et al*; 2018 | [30] | GSE107591 | 16 | 17 |
| Rentoft, M. *et al*; 2012 | [33] | GSE34115 | 16 | 62 |
| Khan, MM. *et al*; 2023 | [27] | GSE227919 | 17 | 9 |
| Reis, PP. *et al*; 2011 | [34] | GSE31056 | 24 | 22 |
| Ambatipudi, S. *et al*; 2012 | [35] | GSE23558 | 5 | 27 |
| Peng, C. *et al*; 2011 | [36] | GSE25099 | 22 | 57 |
| Chen, C. *et al*; 2008 | [28] | GSE30784 | 45 | 167 |
| Sheu, JJ. *et al*; 2013 | [29] | GSE37991 | 40 | 40 |
| Oghumu, S. *et al*; 2016 | [32] | GSE74530 | 6 | 6 |
| Ye, H. *et al*; 2008 | [31] | GSE9844 | 12 | 26 |

*Table S1. GEO Datasets included in the meta-analysis*
