# Supplementary material for: ENDOU is potentially a robust diagnostic and prognostic biomarker in oral squamous cell carcinoma
Source: Research Square preprint supplement (doi:10.21203/rs.3.rs-6340150/v1), 2025-11-05
Supplement: Supplementary file 4 [file b08a957e7de3ccccaef7374b.docx]

*Table 2. Diagnostic performance of ENDOU staining*

| Biomarker | Sensitivity (95% CI ) | Specificity (95% CI ) | NPV (95% CI ) | PPV (95% CI ) | Accuracy (95% CI ) | p value |
| --- | --- | --- | --- | --- | --- | --- |
| ENDOU | 0.93 (0.85-0.98) | 0.91 (0.72-0.99) | 0.81 (0.64-0.91) | 0.97 (0.90-0.99) | 0.93 (0.85-0.97) | 0.035 |
| PDPN | 0.72 (0.58-0.84) | 1.00 (0.63-1.00) | 0.36 (0.27-0,47) | 1.00 (0.90-1.00) | 0.76 (0.63-0.86) |
