# Supplementary material for: ENDOU is potentially a robust diagnostic and prognostic biomarker in oral squamous cell carcinoma
Source: Research Square preprint supplement (doi:10.21203/rs.3.rs-6340150/v1), 2025-11-05
Supplement: Supplementary file 5 [file b369bb90696b56862cedb075.docx]

***Table S2.*** *Flow diagram of the process of identification and selection of primary-level studies offering scientific information on the gene expression profiles in the OSCC tissues.*

**Identification of studies via databases and registers**

Records removed *before screening*:

Duplicate records removed (n =1019)

Records marked as ineligible by automation tools (4006)

Records identified from GEO Datasets database (n=5807)

Manual searching (n = 12)

**Identification**

Records screened

(n =782)

Records excluded due to not matching inclusion criteria

(n =476)

Reports sought for retrieval

(n =306)

Reports not retrieved

(n =7)

**Screening**

Reports assessed for eligibility

(n =16)

Reports excluded:

Duplicates (n = 2)

Data not publicly available (n = 3)

Not matching the inclusion criteria (n =1)

etc.

Studies included in Meta-analysis

(n = 10)

**Included**
